# Supplementary material for: The control of hyperglycemia by a novel trypsin resistant oral insulin preparation in alloxan induced type I diabetic mice
Source: PubMed Central journal article supplement (PMC4881006; doi:10.1038/srep26789), 2016-05-26
Supplement: srep26789-s1.pdf [file srep26789-s1.pdf]

**Title: The control of hyperglycemia by a novel trypsin resistant oral insulin preparation in alloxan induced type I diabetic mice.**

**Authors: Sarbashri Bank<sup>1,2</sup>, Arjun Ghosh<sup>1</sup>, Suman Bhattacharya<sup>1</sup>, Smarajit Maiti<sup>2</sup>, Gausal A Khan<sup>3</sup>, Asru K Sinha<sup>1§</sup>**

**Affiliation: <sup>1</sup>Sinha Institute of Medical Science & Technology  
288-Kendua main road, Baishnabghata, Garia, Kolkata-700084, India**

**<sup>2</sup>Cell & Molecular Therapeutic Lab, Dept. of Biochemistry, Vidyasagar University<sup>2</sup>, Midnapur-721102**

**<sup>3</sup>Department of Physiology, Defence Institute of Physiology and Allied Sciences<sup>3</sup>, Timarpur, Delhi, India.**

**§Corresponding author:**

**Prof. Asru K Sinha, D.Sc.**

**Sinha Institute of Medical Science & Technology  
288-Kendua main road, Baishnabghata, Garia, Kolkata-700084  
Phone-+919038975945, India  
Fax: 033-28371048  
Email: asruksinha@yahoo.com**

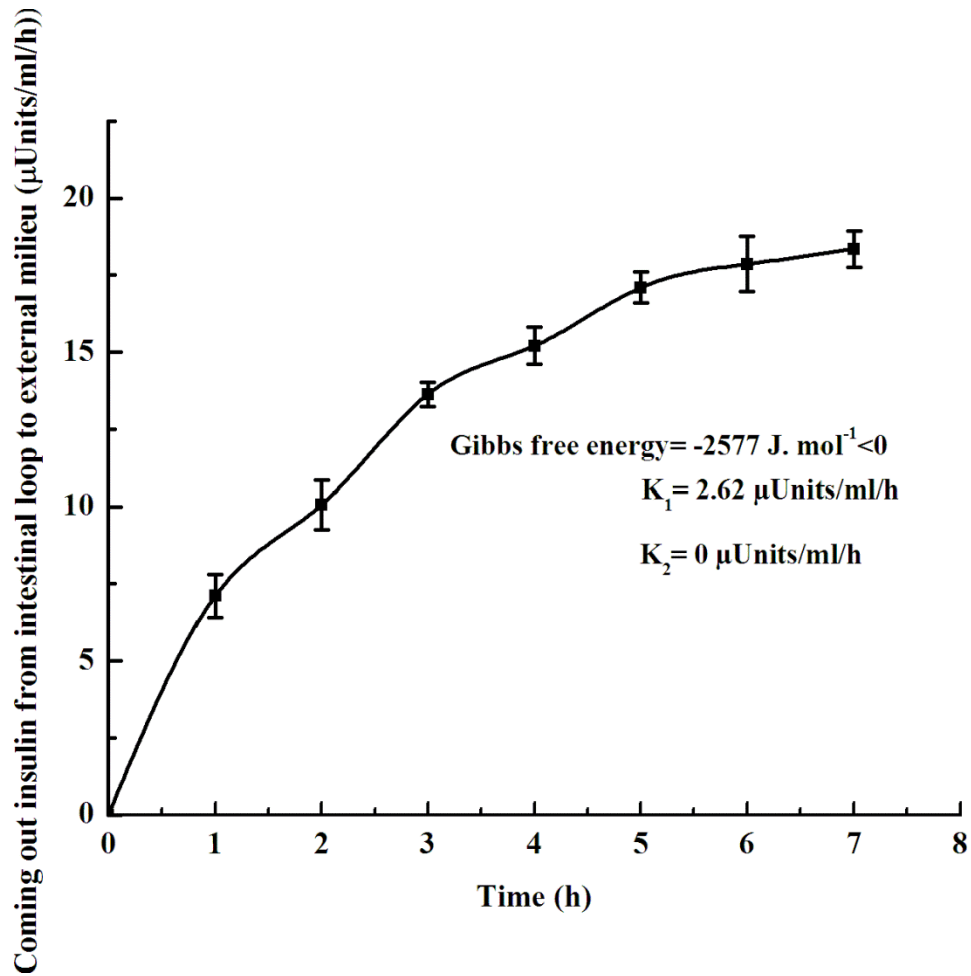

**Supplementary Fig. S1: Coming out of milk-insulin preparation from the intestinal loop to the external milieu was a facilitated diffusion**

The amount of insulin came out from intestinal loop to the external milieu was analyzed by enzyme linked immunosorbant assay using insulin antibody. From the assay, it was found that the rate of coming out of insulin ( $K_1$ ) from the intestinal loop was continuously increased in each hour (2.62  $\mu$ Units of insulin/ml/h) and the backward movement  $K_2$  was undetectable (0  $\mu$ Units of insulin/ml/h) was found like a hyperbolic curve which demonstrated that the phenomenon was

not a simple diffusion but energy independent thermodynamically favored ( $\Delta G = -2577 \text{ J. mol}^{-1}$ ,  $\Delta G < 0$  indicating a spontaneous reaction) facilitated diffusion transportation.
